# Supplementary material
Source: PubMed Central journal article supplement (PMC4554208)
Supplement: ry140446suppa1.pdf [file ry140446suppa1.pdf]

**Table E1. Results of Linear Regression Analysis for Male Subjects (n = 563)**

| Variable                        | Coefficient | P Value | 95% CI        |
|---------------------------------|-------------|---------|---------------|
| Age (y)                         | 0.088       | <.001   | 0.044, 0.132  |
| BMI (kg/m <sup>2</sup> )        | 0.493       | <.001   | 0.319, 0.666  |
| Normal glucose tolerance*       | ...         | ...     | ...           |
| Prediabetes                     | -0.041      | .942    | -1.148, 1.066 |
| Type 2 diabetes                 | -0.160      | .909    | -2.910, 2.590 |
| Systolic blood pressure (mm Hg) | -0.031      | .180    | -0.075, 0.014 |
| Alcohol intake (g/d)            | 0.011       | .600    | -0.030, 0.051 |
| Nonsmoker*                      | ...         | ...     | ...           |
| Former smoker                   | 0.947       | .138    | -0.304, 2.198 |
| Current smoker                  | -1.155      | .091    | -2.497, 0.186 |
| Physical activity (yes/no)      | -0.519      | .322    | -1.549, 0.511 |
| ALT/AST ratio                   | 0.486       | .443    | -0.759, 1.732 |
| Lipase level (μkat/L)†          | 10.941      | <.001   | 5.234, 16.649 |
| Creatinine level (μmol/L)       | 0.023       | .255    | -0.017, 0.063 |
| Triglycerides level (mmol/L)    | 0.325       | .367    | -0.382, 1.032 |
| Cholesterol-HDL ratio           | 0.063       | .854    | -0.611, 0.737 |

Note.— $R^2 = 0.203$ . Overall  $P$  value for smoking was .014, and overall  $P$  value for diabetes was .992.

\* Reference category.

† Polynome:  $(\text{lipase}/10)^{-2}$ .

**Table E2. Results of Linear Regression Analysis for Female Subjects (n = 678)**

| Variable                        | Coefficient | P Value | 95% CI        |
|---------------------------------|-------------|---------|---------------|
| Age (y)                         | 0.113       | <.001   | 0.081, 0.145  |
| BMI (kg/m <sup>2</sup> )        | 0.281       | <.001   | 0.182, 0.380  |
| Normal glucose tolerance*       | ...         | ...     | ...           |
| Prediabetes                     | -0.004      | .994    | -0.951, 0.944 |
| Type 2 diabetes                 | 0.338       | .769    | -1.921, 2.596 |
| Systolic blood pressure (mm Hg) | 0.020       | .215    | -0.012, 0.052 |
| Alcohol intake (g/day)          | -0.051      | .066    | -0.106, 0.003 |
| Nonsmoker*                      | ...         | ...     | ...           |
| Former smoker                   | -0.234      | .613    | -1.144, 0.675 |
| Current smoker                  | 0.079       | .860    | -0.802, 0.960 |
| Physical activity (yes/no)      | 0.494       | .180    | -0.228, 1.217 |
| ALT/AST ratio                   | -0.203      | .618    | -1.004, 0.597 |
| Lipase level (μkat/L)†          | 0.124       | .001    | 0.052, 0.196  |
| Creatinine level (μmol/L)       | 0.024       | .189    | -0.012, 0.059 |
| Triglycerides level (mmol/L)    | 0.116       | .792    | -0.744, 0.976 |
| Cholesterol-HDL ratio           | -0.076      | .766    | -0.578, 0.426 |

Note.— $R^2 = 0.258$ . The overall  $P$  value for diabetes was .956, and the overall  $P$  value for smoking was .789.

\* Reference category.

† Polynome:  $(\text{lipase}/10)^{-2}$ .
